# Supplementary material for: Inferring methane emissions from African livestock by fusing drone, tower, and satellite data
Source: Copernicus journal article supplement (doi:10.5194/bg-22-4163-2025), 2025-08-26
Supplement: Supplementary file 1 [file bg-22-4163-2025-supplement.pdf]

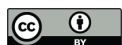

*Supplement of*

**Inferring methane emissions from African livestock by fusing drone, tower, and satellite data**

**Alouette van Hove et al.**

*Correspondence to:* Alouette van Hove (a.van.hove@geo.uio.no)

The copyright of individual parts of the supplement might differ from the article licence.

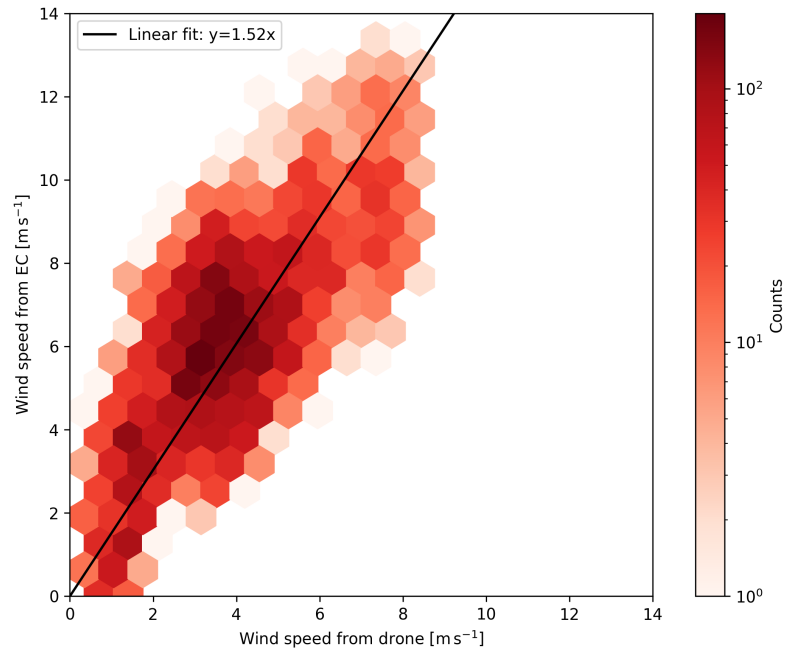

**Figure S1.** Correlation between the wind speed reported by the drone and the wind speed obtained by the anemometer on the eddy-covariance tower (EC). The data is obtained during hovering flights at the same altitude as the anemometer on the tower. The linear fit is used to correct the drone data.

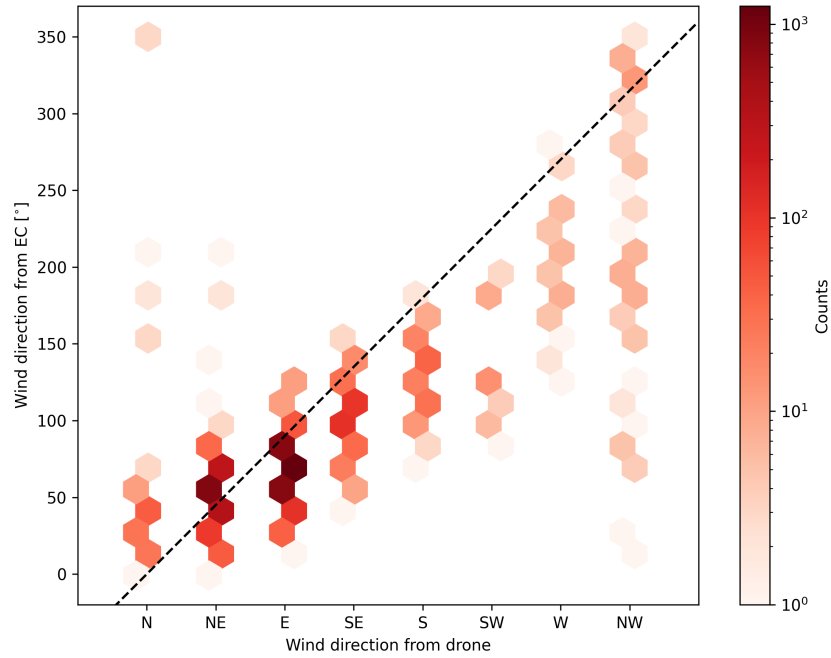

**Figure S2.** Correlation between the wind direction reported by the drone and the wind direction obtained by the anemometer on the eddy-covariance tower (EC). The data is obtained during hovering flights at the same altitude as the anemometer on the tower. The dashed line denotes a perfect linear fit:  $y = x$ .

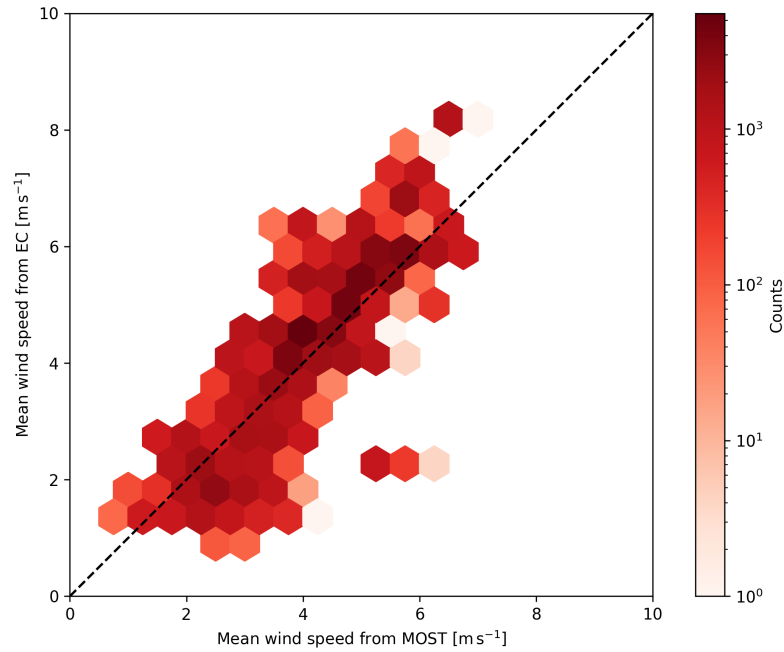

**Figure S3.** Correlation between the mean wind speed (over 30-min intervals) of the anemometer on the eddy-covariance tower (EC) and the mean wind speed from Monin Obukhov Similarity Theory at the height of the anemometer on the tower. The dashed line denotes a perfect linear fit:  $y = x$ .



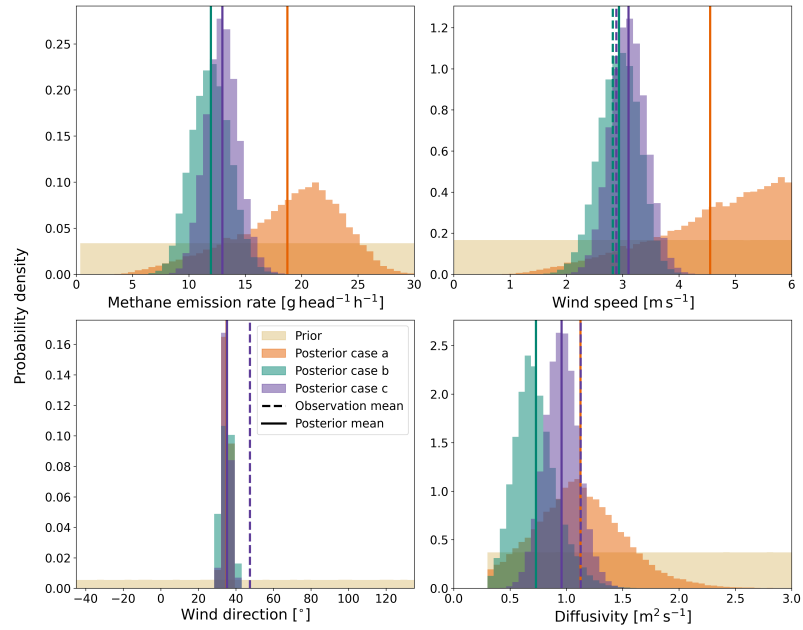

**Figure S4.** Bayesian inference method results for cows at 02/03/2024 07:45 Coordinated Universal Time (UTC) + 3 hours, corresponding to East Africa Time (EAT).

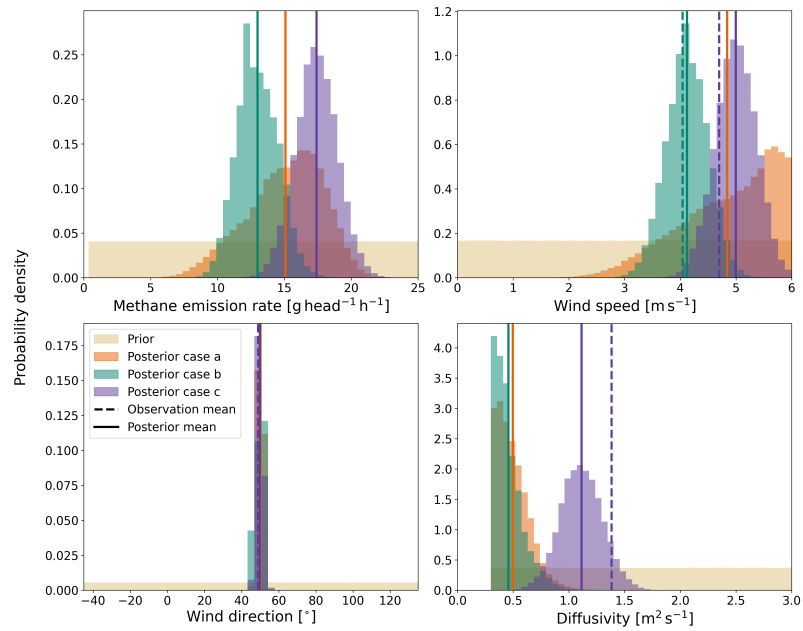

**Figure S5.** Bayesian inference method results for cows at 02/03/2024 13:05 UTC + 3 (EAT).

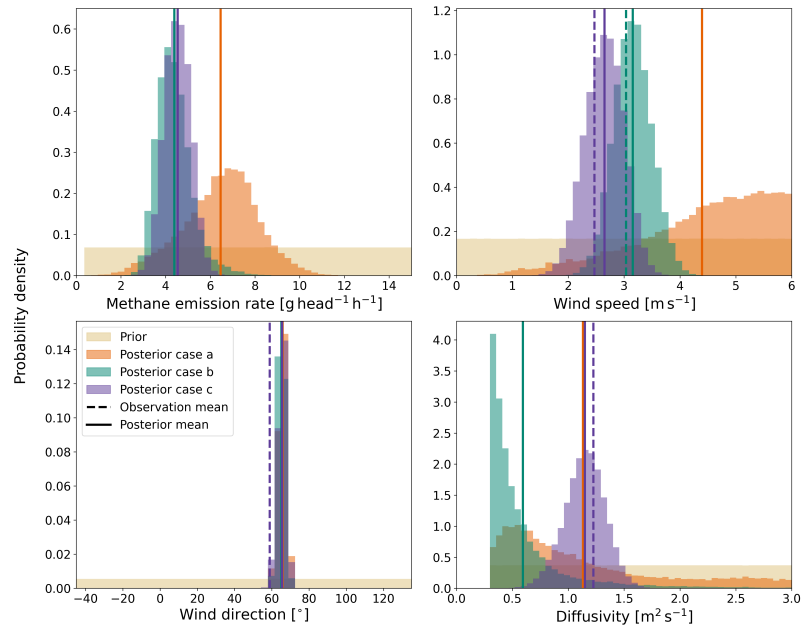

**Figure S6.** Bayesian inference method results for heifers at 02/03/2024 06:30 UTC + 3 (EAT).

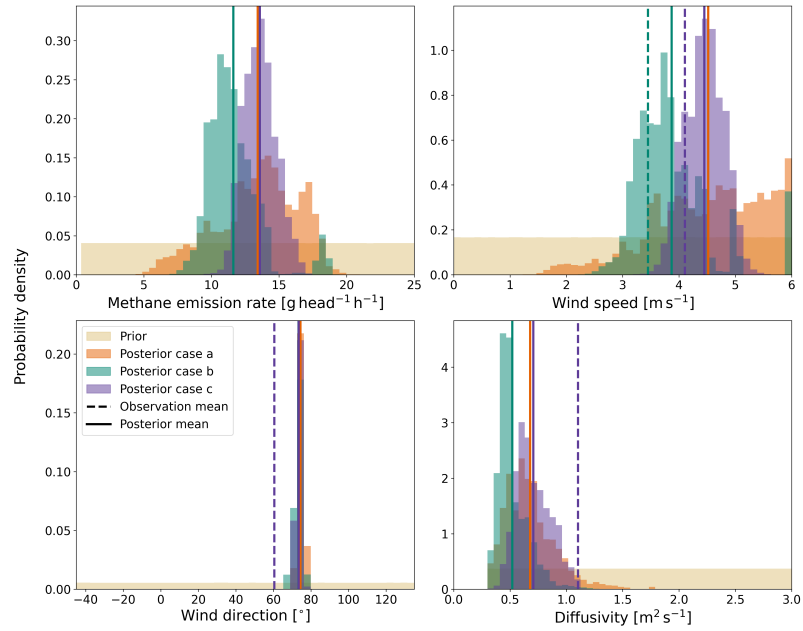

**Figure S7.** Bayesian inference method results for heifers at 02/03/2024 14:00 UTC + 3 (EAT).

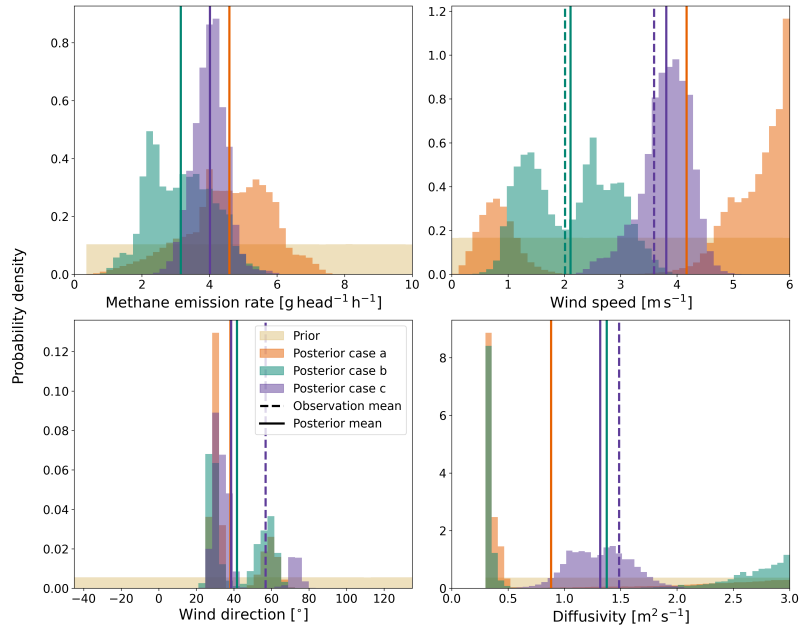

**Figure S8.** Bayesian inference method results for heifers at 06/03/2024 07:00 UTC + 3 (EAT).

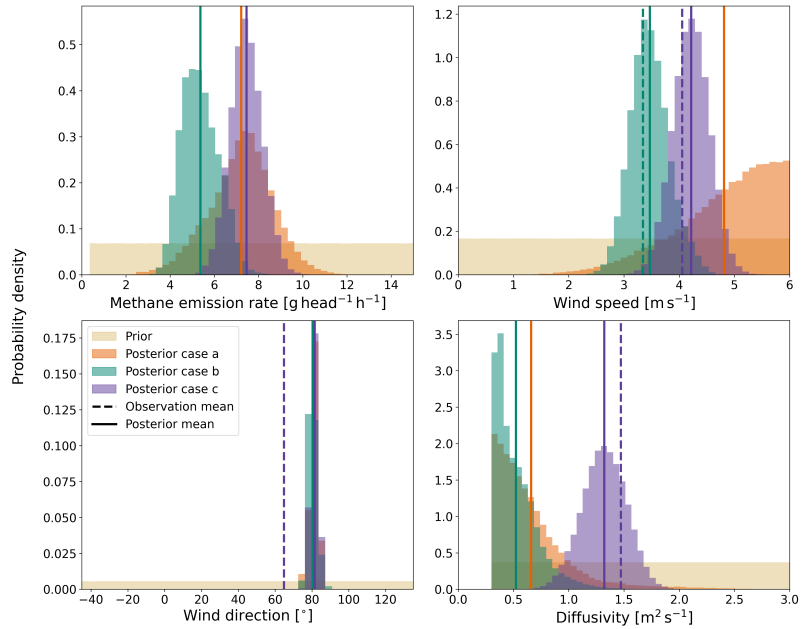

**Figure S9.** Bayesian inference method results for heifers at 06/03/2024 12:50 UTC + 3 (EAT).

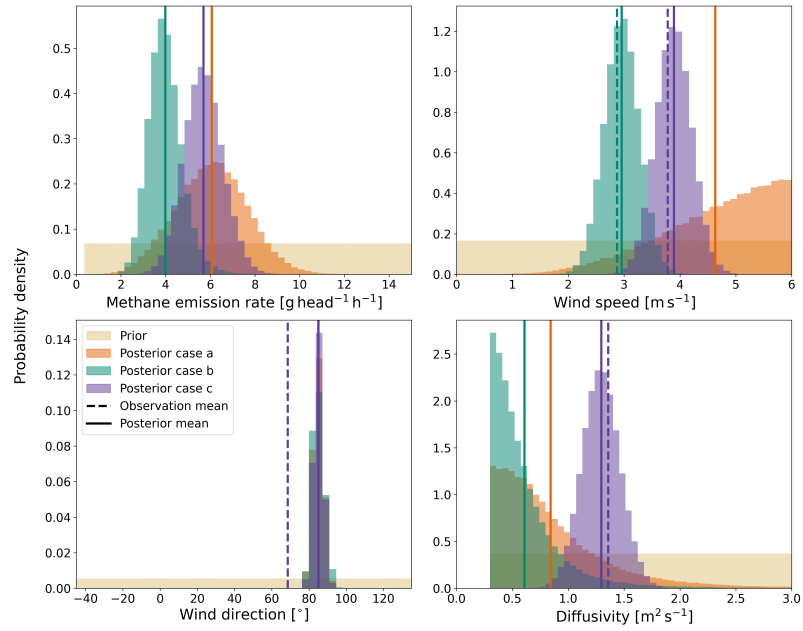

**Figure S10.** Bayesian inference method results for steers at 05/03/2024 06:15 UTC + 3 (EAT).

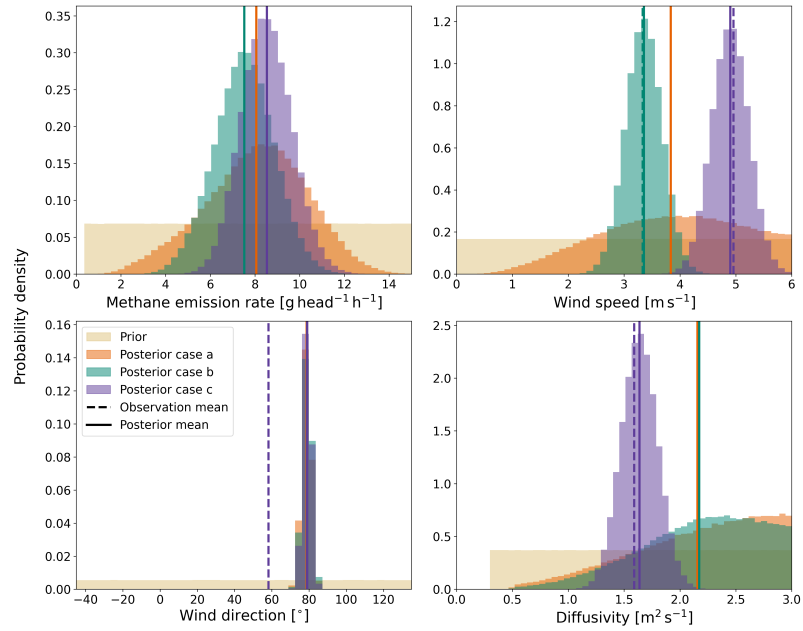

**Figure S11.** Bayesian inference method results for steers at 05/03/2024 11:55 UTC + 3 (EAT).

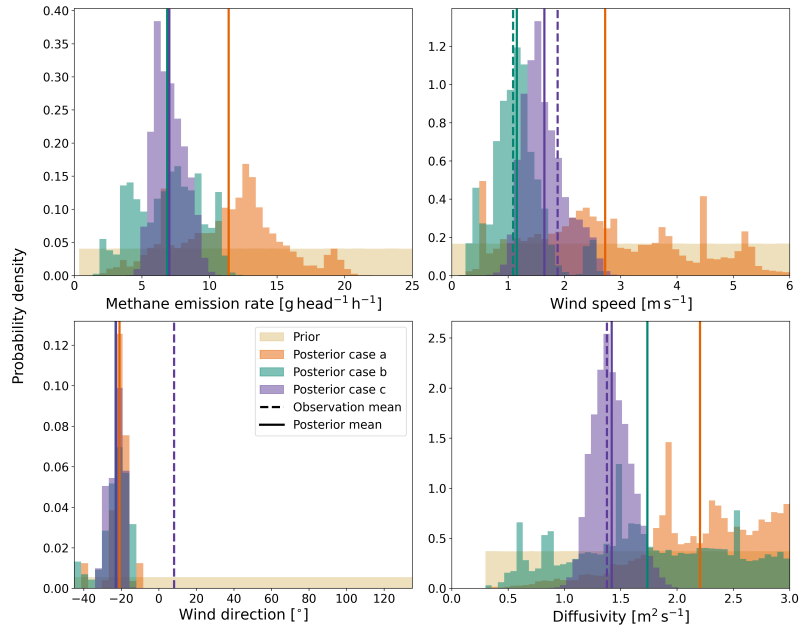

**Figure S12.** Bayesian inference method results for slick herd at 03/03/2024 07:05 UTC + 3 (EAT).

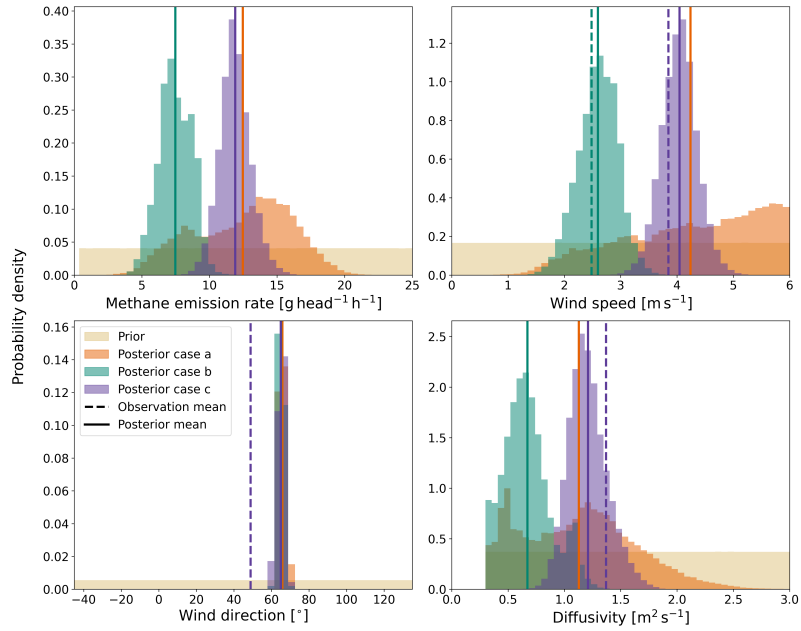

**Figure S13.** Bayesian inference method results for slick herd at 03/03/2024 12:10 UTC + 3 (EAT).

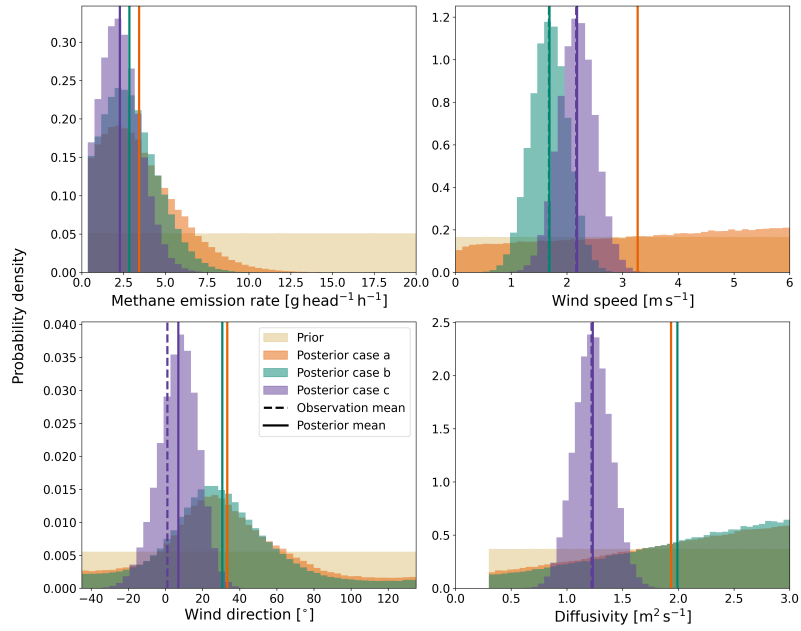

**Figure S14.** Bayesian inference method results for camels at 04/03/2024 06:25 UTC + 3 (EAT).

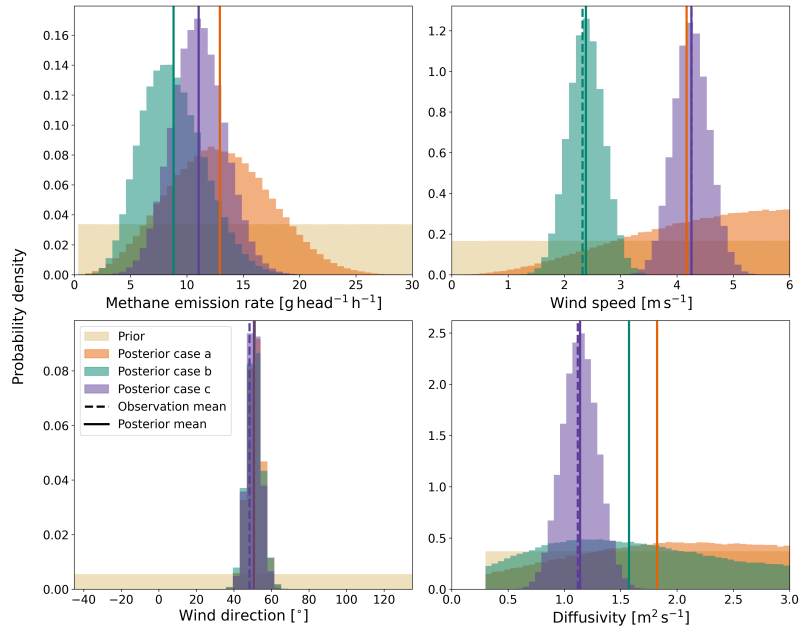

**Figure S15.** Bayesian inference method results for camels at 04/03/2024 12:00 UTC + 3 (EAT).

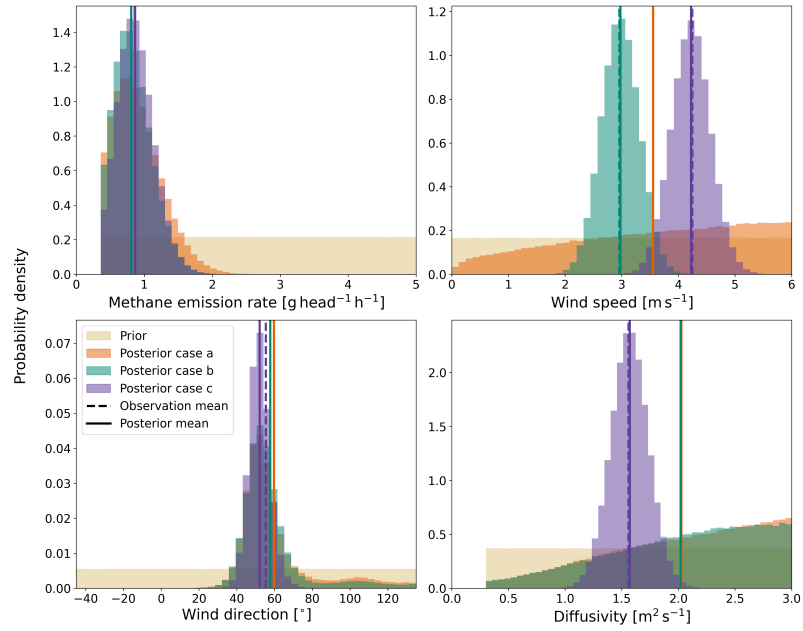

**Figure S16.** Bayesian inference method results for lactating ewes at 07/03/2024 07:40 UTC + 3 (EAT).

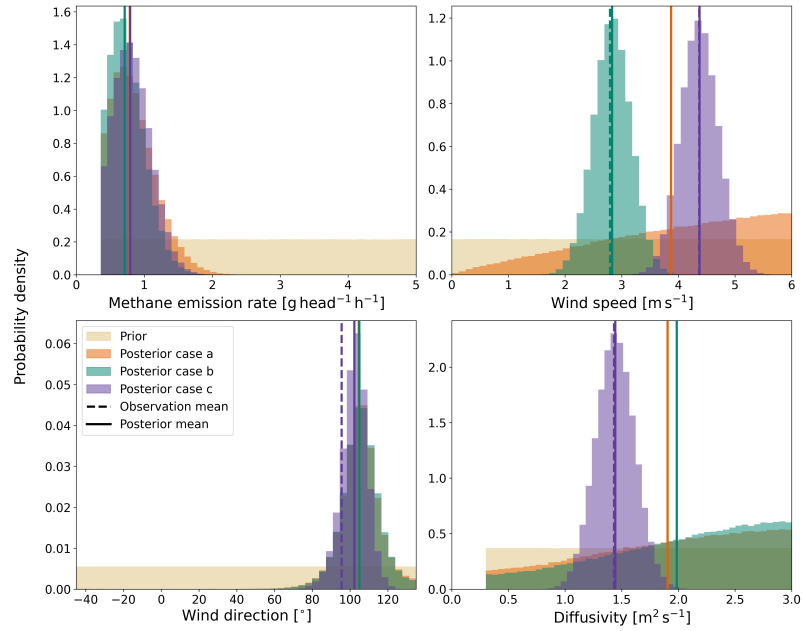

**Figure S17.** Bayesian inference method results for lactating ewes at 07/03/2024 13:25 UTC + 3 (EAT).

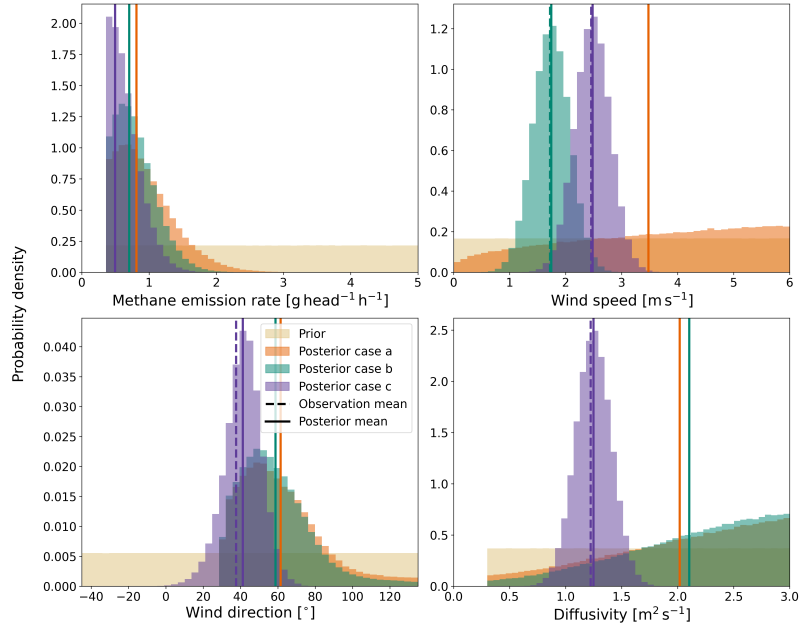

**Figure S18.** Bayesian inference method results for dry does at 01/03/2024 06:45 UTC + 3 (EAT). Wind direction prior is  $\mathcal{U}(30, 135)$  for cases (a) and (b).

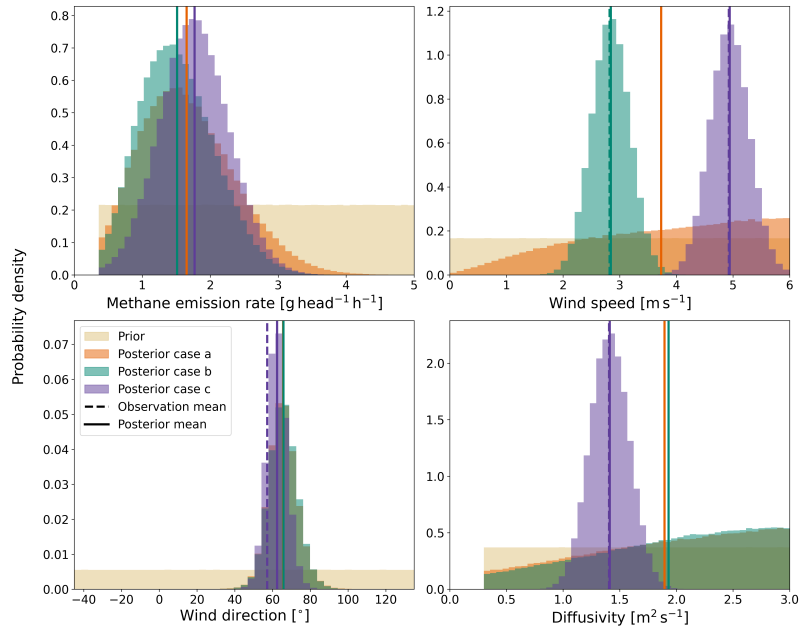

**Figure S19.** Bayesian inference method results for dry does at 01/03/2024 12:25 UTC + 3 (EAT). Wind direction prior is  $\mathcal{U}(30, 135)$  for cases (a) and (b).



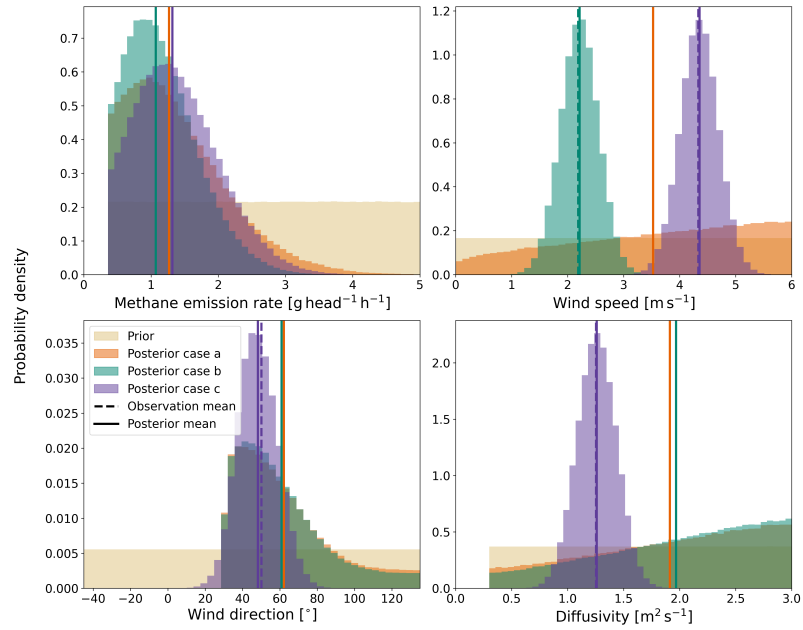

**Figure S20.** Bayesian inference method results for pregnant does at 29/02/2024 13:15 UTC + 3 (EAT). Wind direction prior is  $\mathcal{U}(30, 135)$  for cases (a) and (b).

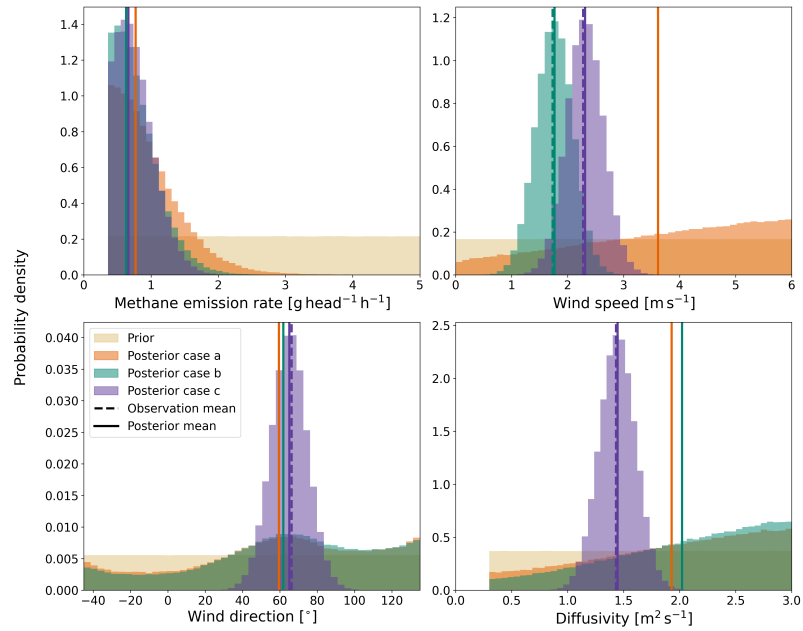

**Figure S21.** Bayesian inference method results for pregnant does at 07/03/2024 06:30 UTC + 3 (EAT).

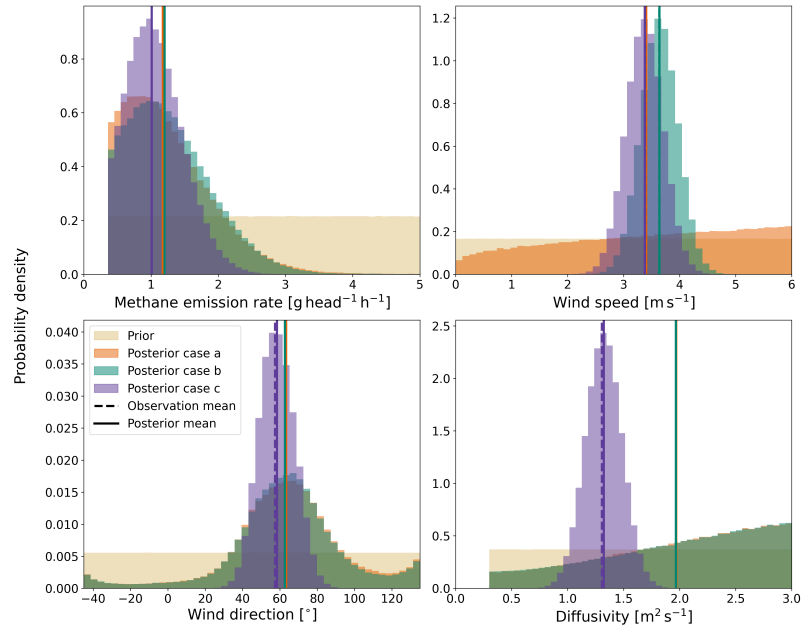

**Figure S22.** Bayesian inference method results for pregnant does at 07/03/2024 12:20 UTC + 3 (EAT).

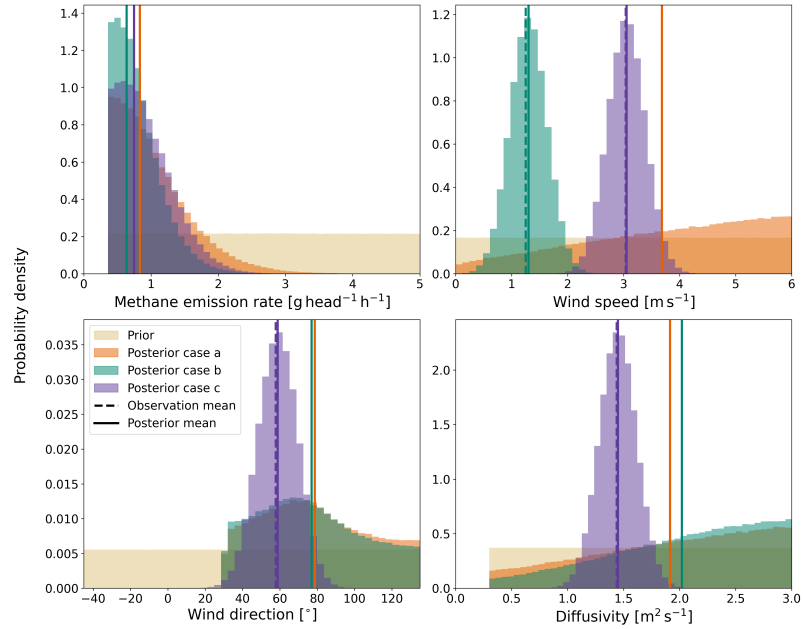

**Figure S23.** Bayesian inference method results for weaner kids at 01/03/2024 07:55 UTC + 3 (EAT). Wind direction prior is  $\mathcal{U}(30, 135)$  for cases (a) and (b).

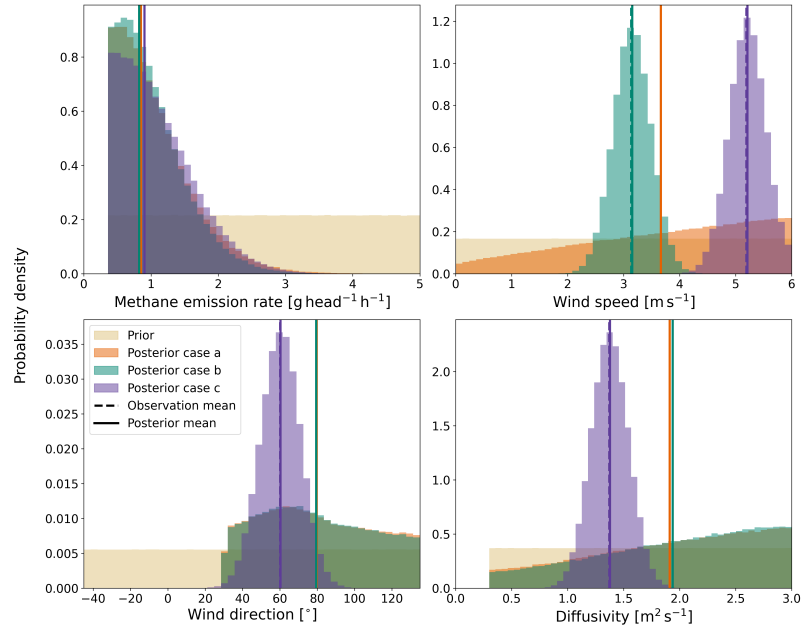

**Figure S24.** Bayesian inference method results for weaner kids at 01/03/2024 13:45 UTC + 3 (EAT). Wind direction prior is  $\mathcal{U}(30, 135)$  for cases (a) and (b).

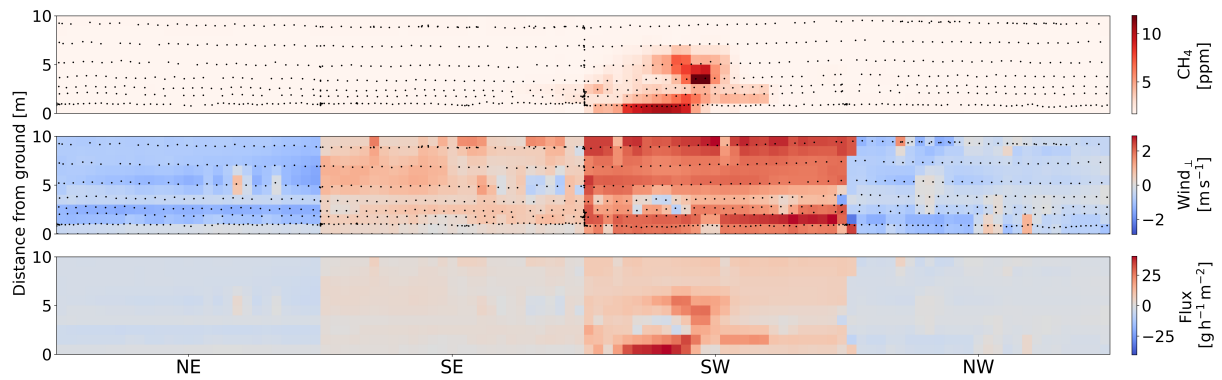

**Figure S25.** Mass balance method results for cows at 02/03/2024 07:10 UTC + 3 (EAT):  $q = 18.3 \pm 2.5 \text{ g head}^{-1} \text{h}^{-1}$ .

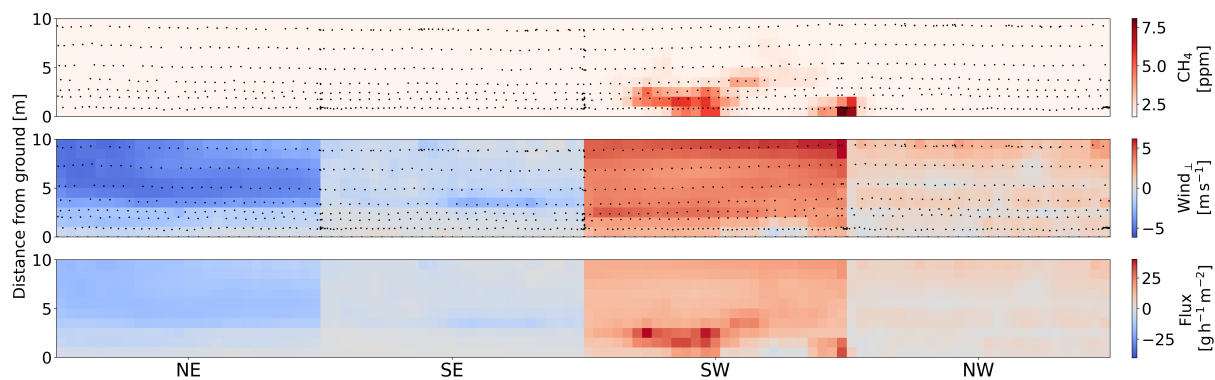

**Figure S26.** Mass balance method results for cows at 02/03/2024 12:40 UTC + 3 (EAT):  $q = 10.6 \pm 3.1 \text{ g head}^{-1} \text{ h}^{-1}$ .

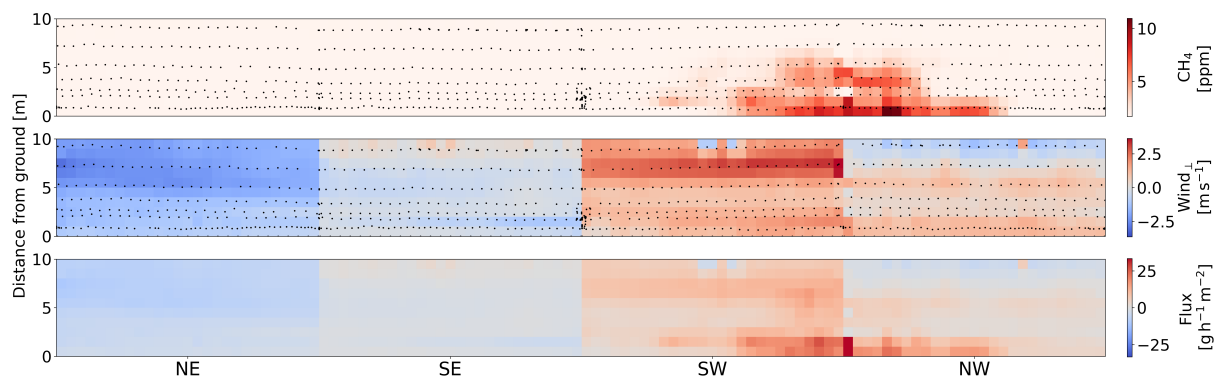

**Figure S27.** Mass balance method results for heifers at 02/03/2024 06:05 UTC + 3 (EAT):  $q = 5.2 \pm 1.3 \text{ g head}^{-1} \text{ h}^{-1}$ .

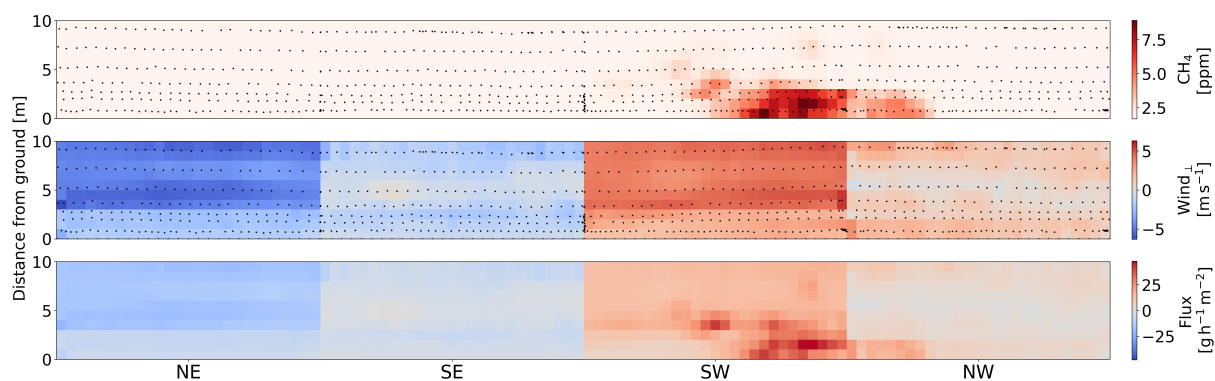

**Figure S28.** Mass balance method results for heifers at 02/03/2024 13:35 UTC + 3 (EAT):  $q = 5.9 \pm 1.4 \text{ g head}^{-1} \text{ h}^{-1}$ .

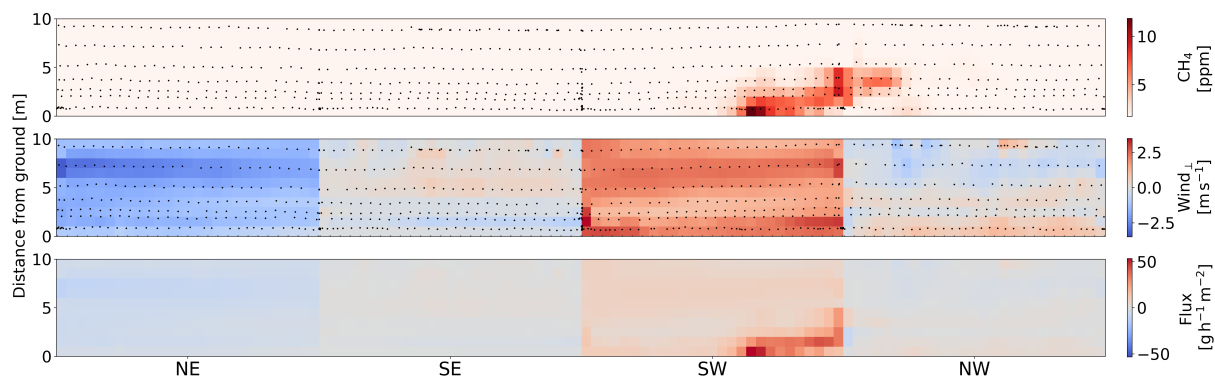

**Figure S29.** Mass balance method results for heifers at 06/03/2024 06:40 UTC + 3 (EAT):  $q = 5.1 \pm 1.3 \text{ g head}^{-1} \text{ h}^{-1}$ .

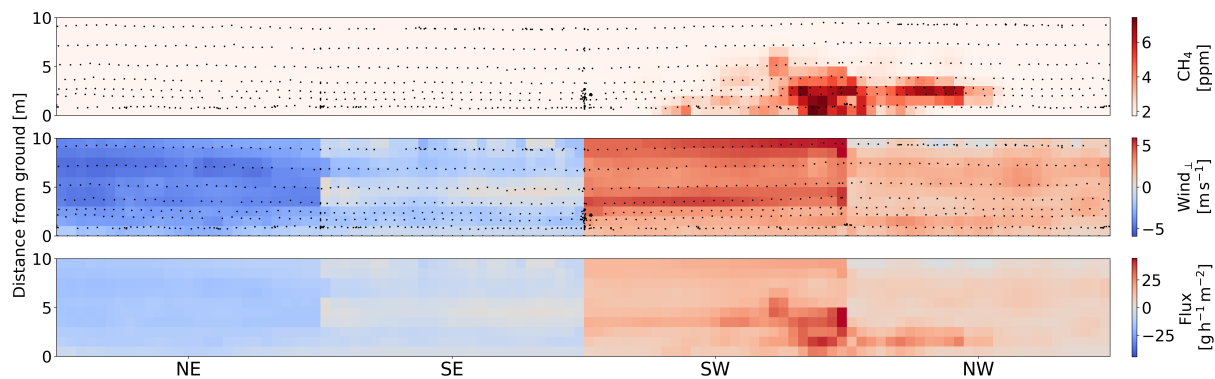

**Figure S30.** Mass balance method results for heifers at 06/03/2024 12:20 UTC + 3 (EAT):  $q = 8.2 \pm 1.7 \text{ g head}^{-1} \text{ h}^{-1}$ .

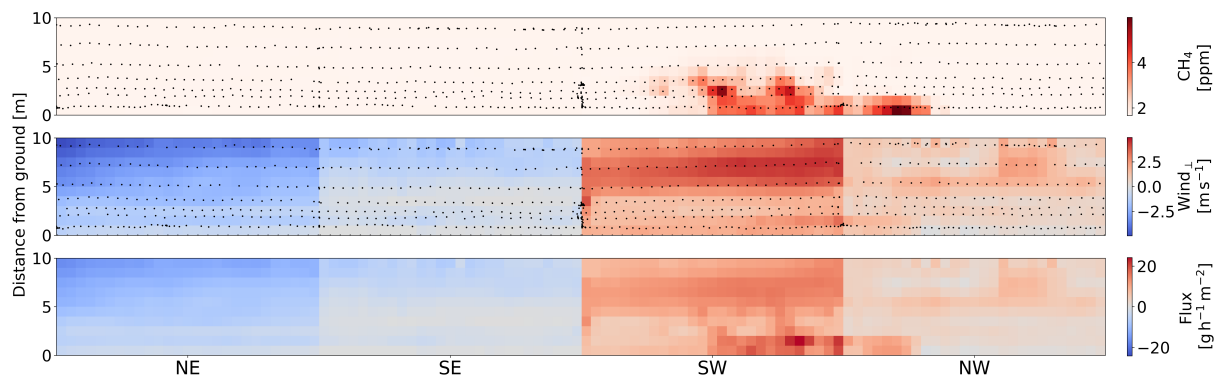

**Figure S31.** Mass balance method results for steers at 05/03/2024 05:50 UTC + 3 (EAT):  $q = 9.5 \pm 2.1 \text{ g head}^{-1} \text{ h}^{-1}$ .

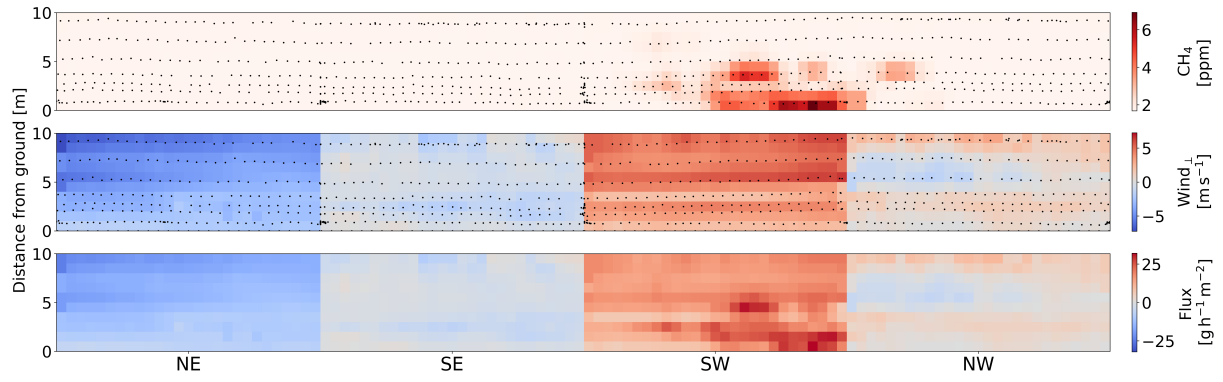

**Figure S32.** Mass balance method results for steers at 05/03/2024 11:30 UTC + 3 (EAT):  $q = 7.4 \pm 2.5 \text{ g head}^{-1} \text{ h}^{-1}$ .

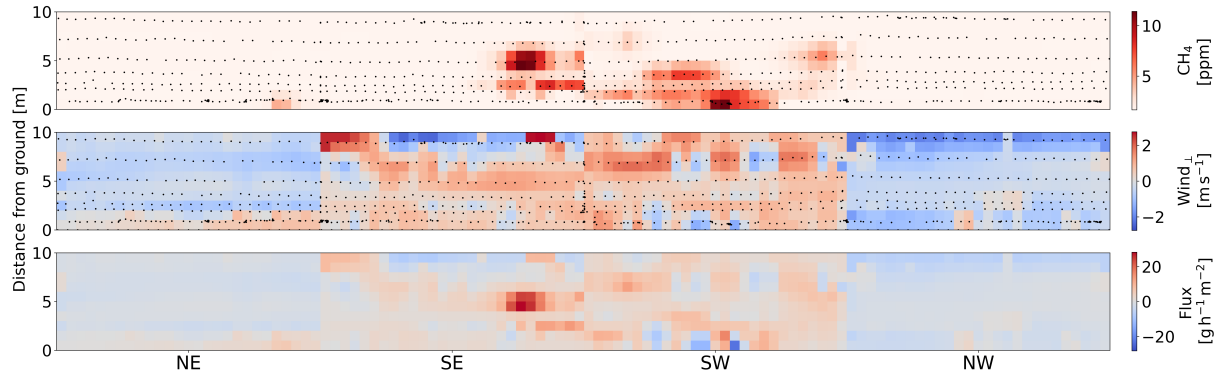

**Figure S33.** Mass balance method results for slick herd at 03/03/2024 06:30 UTC + 3 (EAT):  $q = 3.3 \pm 2.2 \text{ g head}^{-1} \text{ h}^{-1}$ . Marked as unreliable result.

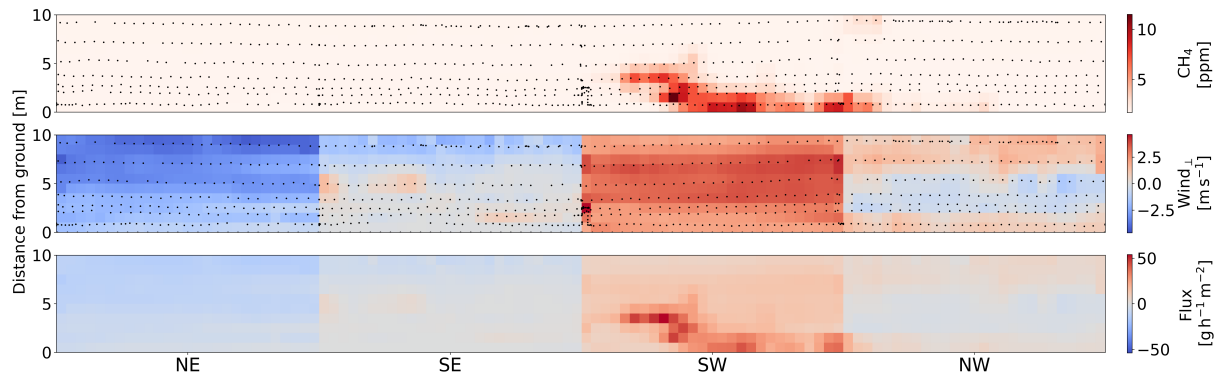

**Figure S34.** Mass balance method results for slick herd at 03/03/2024 11:45 UTC + 3 (EAT):  $q = 12.5 \pm 2.1 \text{ g head}^{-1} \text{ h}^{-1}$ .

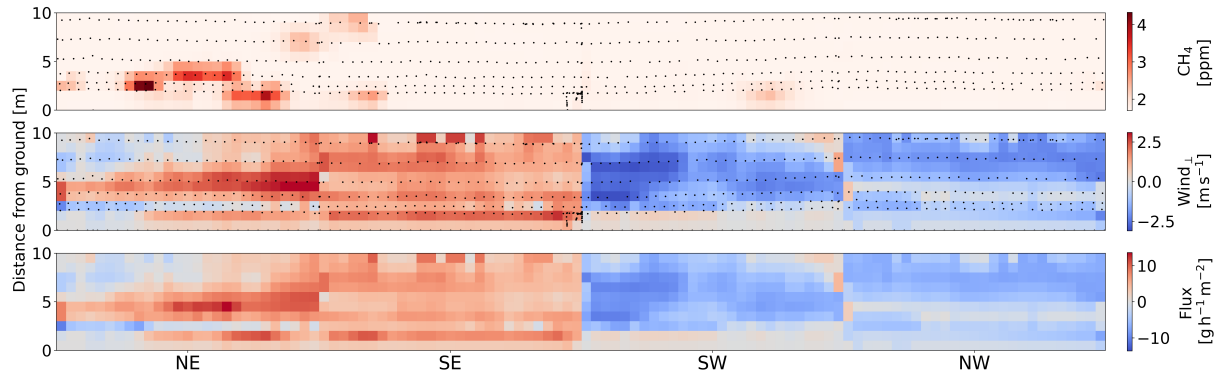

**Figure S35.** Mass balance method results for camels at 04/03/2024 05:55 UTC + 3 (EAT):  $q = -2.6 \pm 7.4 \text{ g head}^{-1} \text{ h}^{-1}$ . Marked as unreliable result.

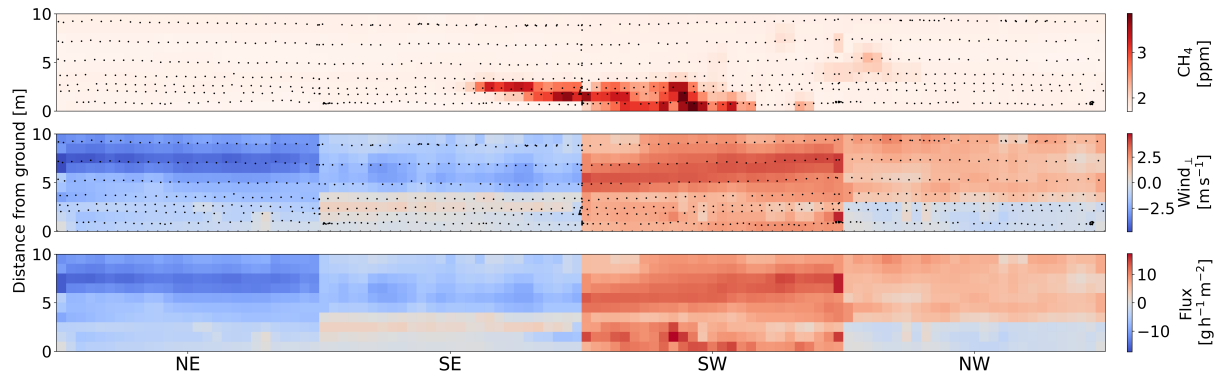

**Figure S36.** Mass balance method results for camels at 04/03/2024 11:40 UTC + 3 (EAT):  $q = 8.4 \pm 6.9 \text{ g head}^{-1} \text{ h}^{-1}$ .

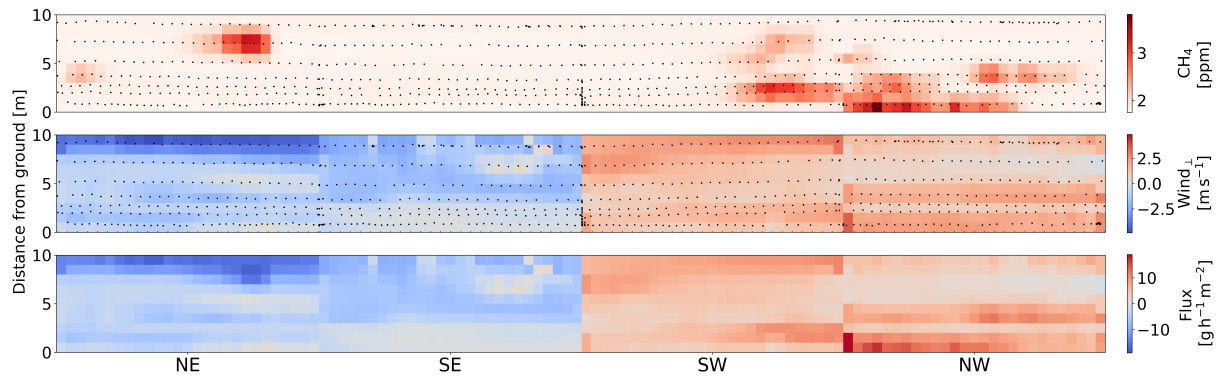

**Figure S37.** Mass balance method results for lactating ewes at 07/03/2024 07:15 UTC + 3 (EAT):  $q = 0.2 \pm 0.7 \text{ g head}^{-1} \text{ h}^{-1}$ . Marked as unreliable result.

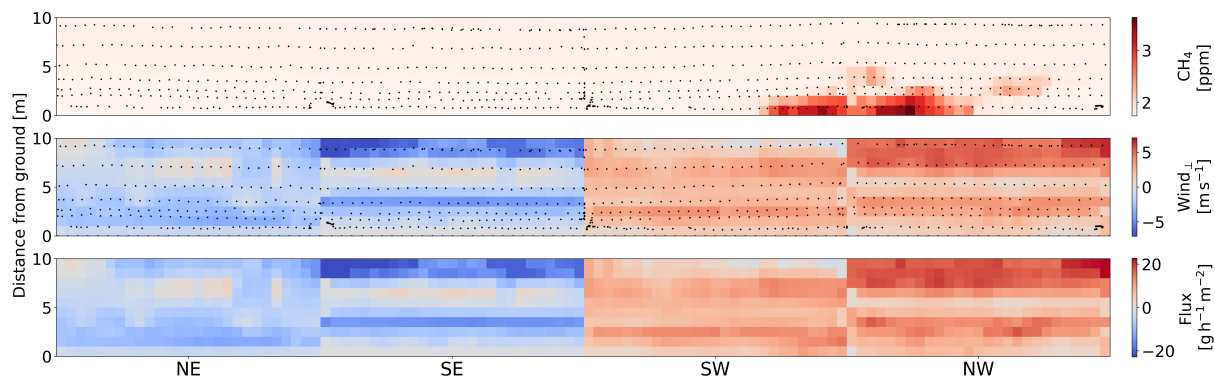

**Figure S38.** Mass balance method results for lactating ewes at 07/03/2024 13:00 UTC + 3 (EAT):  $q = 4.2 \pm 1.4 \text{ g head}^{-1} \text{ h}^{-1}$ . Marked as unreliable result.

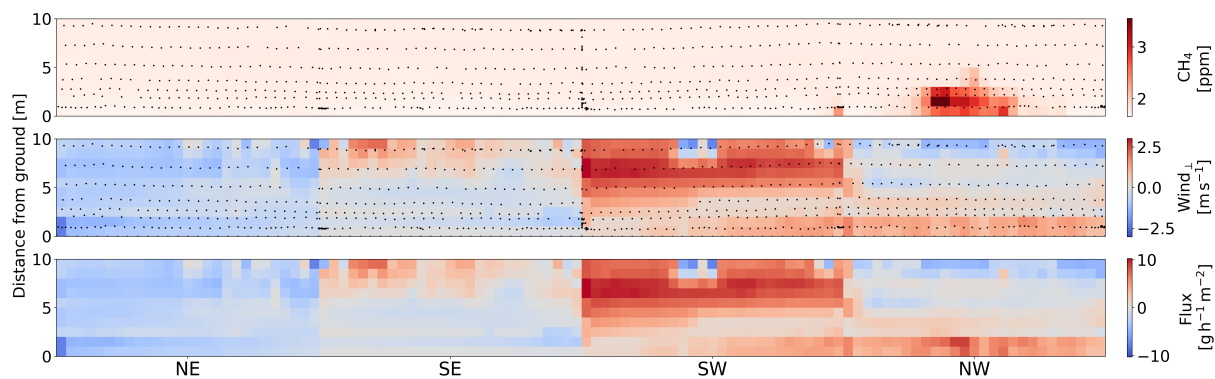

**Figure S39.** Mass balance method results for dry does at 01/03/2024 06:20 UTC + 3 (EAT):  $q = 4.8 \pm 1.3 \text{ g head}^{-1} \text{ h}^{-1}$ . Marked as unreliable result.

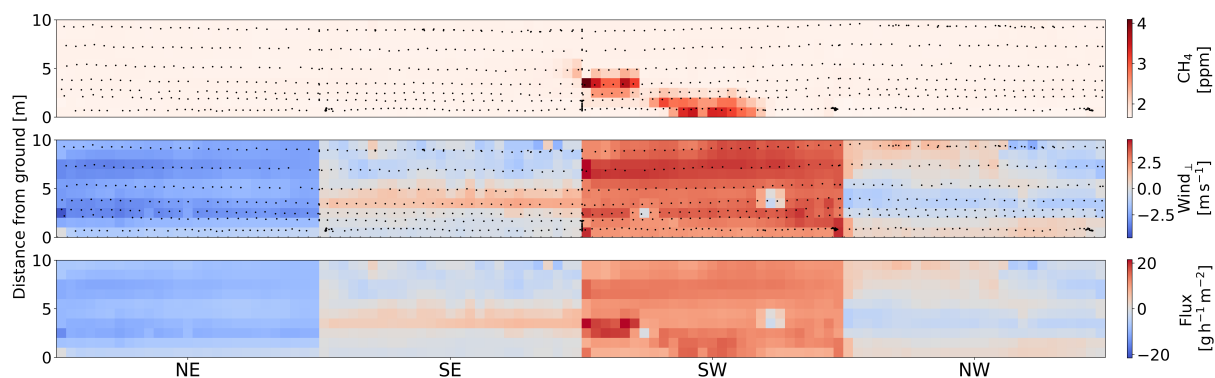

**Figure S40.** Mass balance method results for dry does at 01/03/2024 12:00 UTC + 3 (EAT):  $q = 3.9 \pm 1.5 \text{ g head}^{-1} \text{ h}^{-1}$ . Marked as unreliable result.



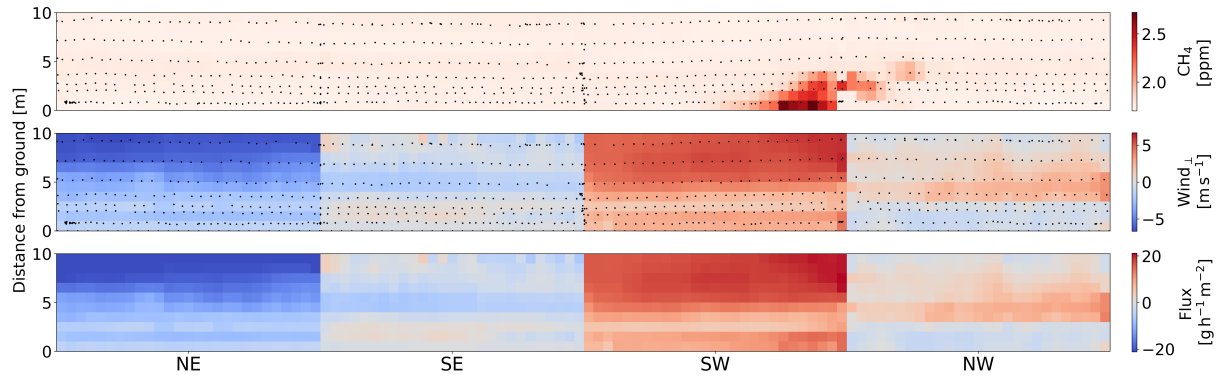

**Figure S41.** Mass balance method results for pregnant does at 29/02/2024 12:50 UTC + 3 (EAT):  $q = 0.8 \pm 2.7 \text{ g head}^{-1} \text{ h}^{-1}$ . Marked as unreliable result.

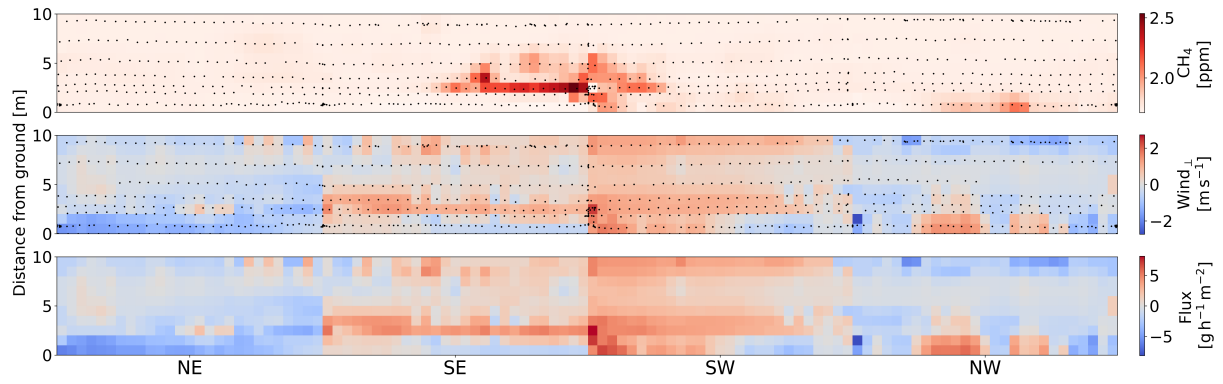

**Figure S42.** Mass balance method results for pregnant does at 07/03/2024 06:00 UTC + 3 (EAT):  $q = 1.7 \pm 1.5 \text{ g head}^{-1} \text{ h}^{-1}$ . Marked as unreliable result.

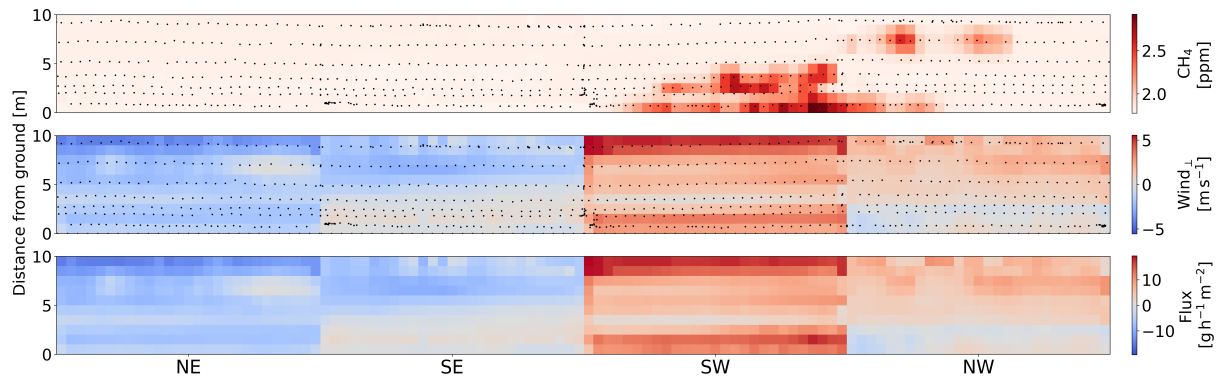

**Figure S43.** Mass balance method results for pregnant does at 07/03/2024 11:50 UTC + 3 (EAT):  $q = 4.2 \pm 1.9 \text{ g head}^{-1} \text{ h}^{-1}$ . Marked as unreliable result.

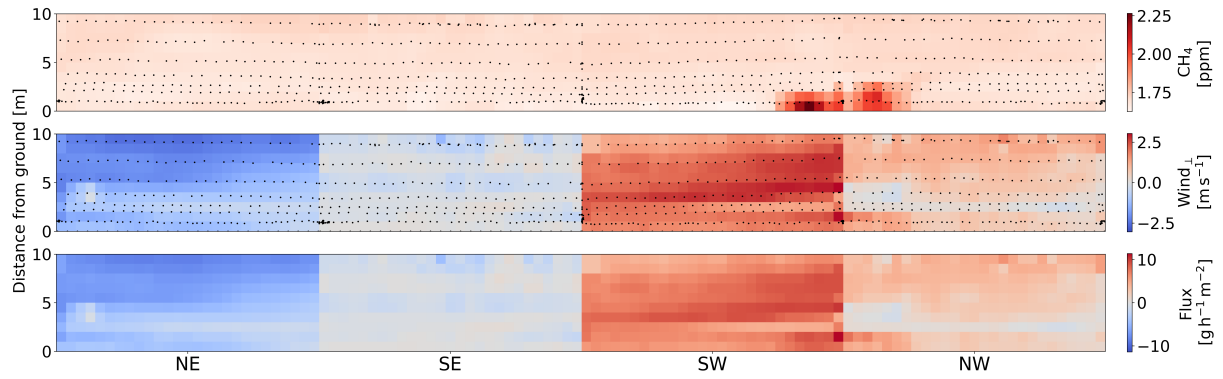

**Figure S44.** Mass balance method results for weaner kids at 01/03/2024 07:30 UTC + 3 (EAT):  $q = 5.0 \pm 1.9 \text{ g head}^{-1} \text{ h}^{-1}$ . Marked as unreliable result.

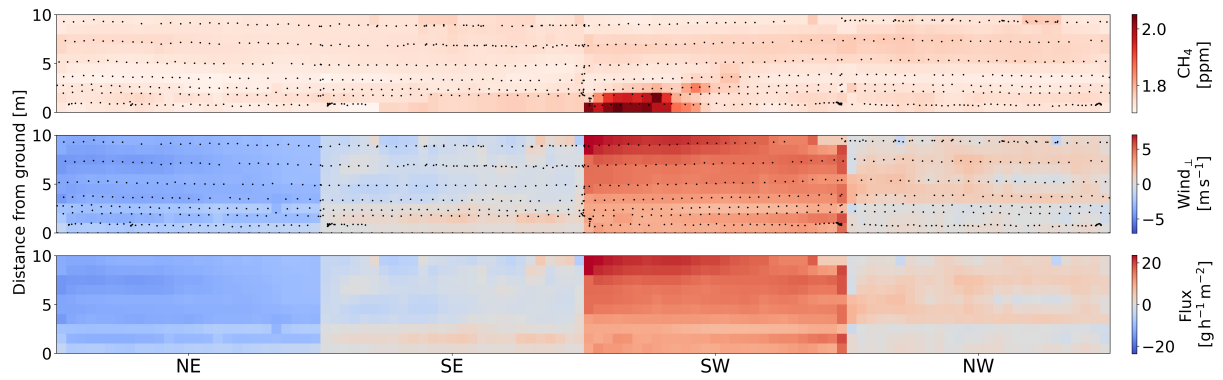

**Figure S45.** Mass balance method results for weaner kids at 01/03/2024 13:00 UTC + 3 (EAT):  $q = 11.1 \pm 2.3 \text{ g head}^{-1} \text{ h}^{-1}$ . Marked as unreliable result.
